# Supplementary material
Source: publisher figshare collection journal article supplement (https://plos.figshare.com/articles/dataset/_/1402772)
Supplement: Supplementary file [file 1]

**S1 Table**

| pp | $R^2$  |          |
|----|--------|----------|
|    | visual | inertial |
| 1  | 0.780  | 0.579    |
| 2  | 0.296  | 0.044    |
| 3  | 0.104  | 0.042    |
| 4  | 0.604  | 0.192    |
| 5  | 0.594  | 0.110    |
| 6  | 0.098  | 0.170    |
| 7  | 0.320  | 0.313    |
| 8  | 0.241  | 0.378    |
| 9  | 0.162  | 0.439    |

**S1 Table.  $R^2$  unisensory models.** Generalized Coefficient of Determination scores,  $R^2$ , for each fitted unisensory model. Scores of zero and one correspond to the worst and best possible fits, respectively.
