# Supplementary material
Source: publisher figshare collection journal article supplement (https://plos.figshare.com/articles/dataset/_/1402772)
Supplement: Supplementary file [file 1]

**S2 Table**

| PP | Visual-only |           |            |            | Inertial-only |           |            |            |
|----|-------------|-----------|------------|------------|---------------|-----------|------------|------------|
|    | $\beta_0$   | $\beta_1$ | $\gamma_0$ | $\gamma_1$ | $\beta_0$     | $\beta_1$ | $\gamma_0$ | $\gamma_1$ |
| 1  | -0.31       | 0.79      | 97.67      | 87.63      | -0.34         | 1.04      | 12.84      | 1.22       |
| 2  | 0.07        | 0.45      | 5.97       | 0.98       | 0.08          | 1.09      | 8.44       | 2.04       |
| 3  | 0.02        | 0.83      | 18.42      | 11.16      | 0.01          | 1.14      | 17.81      | -2.97      |
| 4  | 0.08        | 0.50      | 23.14      | -1.89      | 0.10          | 0.92      | 29.67      | 13.87      |
| 5  | 0.04        | 0.61      | 71.19      | 55.79      | 0.02          | 1.10      | 53.50      | 35.77      |
| 6  | 0.05        | 0.92      | 26.27      | 16.67      | 0.04          | 0.90      | 46.98      | 36.37      |
| 7  | 0.13        | 0.72      | 15.03      | 0.27       | 0.14          | 0.71      | 16.26      | 3.35       |
| 8  | 0.10        | 1.14      | 27.63      | 20.46      | 0.15          | 1.13      | 16.55      | -12.40     |
| 9  | 0.08        | 1.12      | 27.23      | 14.52      | 0.06          | 1.41      | 60.13      | 50.24      |

**S2 Table. Parameter estimates unisensory models.** Parameter estimates for models fitted to data obtained in unisensory conditions.  $\beta_0$  corresponds to constant bias;  $\beta_1$  corresponds to heading-dependent bias, where values  $< 1$  indicate bias *towards* and values  $> 1$  *away* from the fore-aft axis;  $\gamma_0$  is the constant component of the dispersion parameter; and  $\gamma_1$  corresponds to variability of the dispersion as a function of heading angle. All parameters, except those italicized, are significantly different from zero at the 0.01-level (according to Wald  $\chi^2$ -tests).
